# Supplementary material for: Room temperature selective oxidation of aniline to azoxybenzene over a silver supported tungsten oxide nanostructured catalyst
Source: Royal Society of Chemistry journal article supplement (doi:10.1039/c4gc02123a), 2015-01-01
Supplement: c4gc02123a1.pdf [file c4gc02123a1.pdf]

## Electronic Supplementary Information

### Room Temperature Selective Oxidation of Aniline to Azoxybenzene over Silver supported Tungsten Oxide Nanostructured Catalyst †

Shilpi Ghosh,<sup>a</sup> Shankha Shubhra Acharyya,<sup>a</sup> Takehiko Sasaki<sup>b</sup> and Rajaram Bal<sup>a\*</sup>

<sup>a</sup>*Catalytic Conversion & Processes Division, CSIR-Indian Institute of Petroleum, Dehradun  
248005, India*

<sup>b</sup>*Department of Complexity Science and Engineering, Graduate School of Frontier Sciences,  
The University of Tokyo, Kashiwanoha, Kashiwa-shi, Chiba 277-8561, Japan*

[\*]Ms. Shilpi Ghosh, Mr. Shankha Shubhra Acharyya, Prof. Dr. Takehiko Sasaki, Dr.

Rajaram Bal

Corresponding author. Tel.: +91 135 2525917; Fax: +91 135 2660202

E-mail addresses: [raja@iip.res.in](mailto:raja@iip.res.in)

## Experimental:

Azoxybenzene :  $^1\text{H-NMR}$  (500 MHz,  $\text{CDCl}_3$ ):  $\delta$  7.40–7.56 (6H, m), 8.16–8.32 (4H, m); IR,  $\nu$  (KBr disc): 1473, 1435, 1327, 763, 684  $\text{cm}^{-1}$ .

4, 4'-Dichloroazoxybenzene:  $^1\text{H-NMR}$  (500 MHz,  $\text{CDCl}_3$ ):  $\delta$  7.5 (4H, dd,  $J=6$  and 3 Hz), 8.20 (2H, d,  $J=3$  Hz), 8.26 (2H, d,  $J=7$  Hz); IR,  $\nu$  (KBr disc): 1573, 1480, 1399, 1310, 821  $\text{cm}^{-1}$ .

3, 3'-Dichloroazoxybenzene:  $^1\text{H-NMR}$  (500 MHz,  $\text{CDCl}_3$ ):  $\delta$  7.3-7.6 (4H, m), 7.90-8.43 (4H, m); IR,  $\nu$  (KBr disc): 1571, 1471, 1190, 1010, 780, 675  $\text{cm}^{-1}$ .

4, 4'-Dimethoxyazoxybenzene:  $^1\text{H-NMR}$  (500 MHz,  $\text{CDCl}_3$ ):  $\delta$  3.85 (6H, s, OMe), 6.9 (4 H, dd,  $J=9.5$  and 3 Hz), 8.2 (4H, dd,  $J=9$  and 9 Hz); IR,  $\nu$  (KBr disc): 1594, 1492, 1300, 1020, 837  $\text{cm}^{-1}$ .

4, 4'-Dinitroazoxybenzene:  $^1\text{H-NMR}$  (500 MHz,  $\text{CDCl}_3$ ):  $\delta$  8.4(4 H, dd,  $J=5$  and 2 Hz), 8.6 (4H, dd,  $J=5$  and 3 Hz); IR,  $\nu$  (KBr disc): 1514, 1472, 1365, 1078, 847, 719  $\text{cm}^{-1}$ .

2, 2'-Diethylazoxybenzene:  $^1\text{H-NMR}$  (500 MHz,  $\text{CDCl}_3$ ):  $\delta$  2.5 (4H, m), 1.5 (6 H), 7.4-7.6 (6H, m), 7.9 (1H, d,  $J=3$  Hz), 8.3 (1H, d,  $J=2.5$  Hz) ; IR,  $\nu$  (KBr disc): 1597, 1491, 1335, 1120, 827  $\text{cm}^{-1}$ .

3, 3'-Dimethylazoxybenzene:  $^1\text{H-NMR}$  (500 MHz,  $\text{CDCl}_3$ ):  $\delta$  2.34 (6H,s), 7.3–7.5 (4H, m), 7.95–8.2 (4H, m); IR,  $\nu$  (KBr disc): 1597, 1496, 1448, 1336, 780  $\text{cm}^{-1}$ .

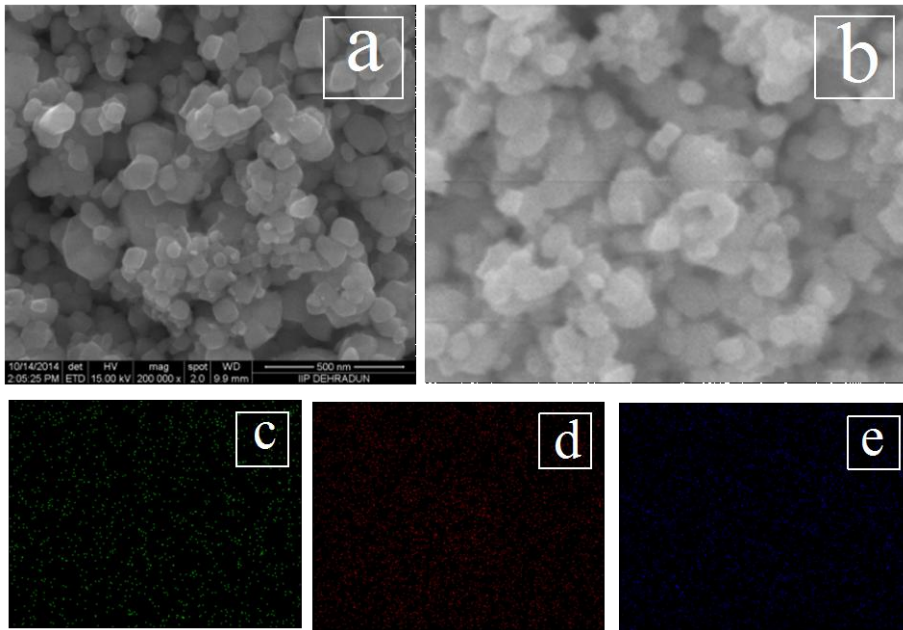

**Figure S1.** Elemental mapping of Ag/WO<sub>3</sub> catalyst a), b) SEM image, c) position of silver, d) position of oxygen and e) position of tungsten.

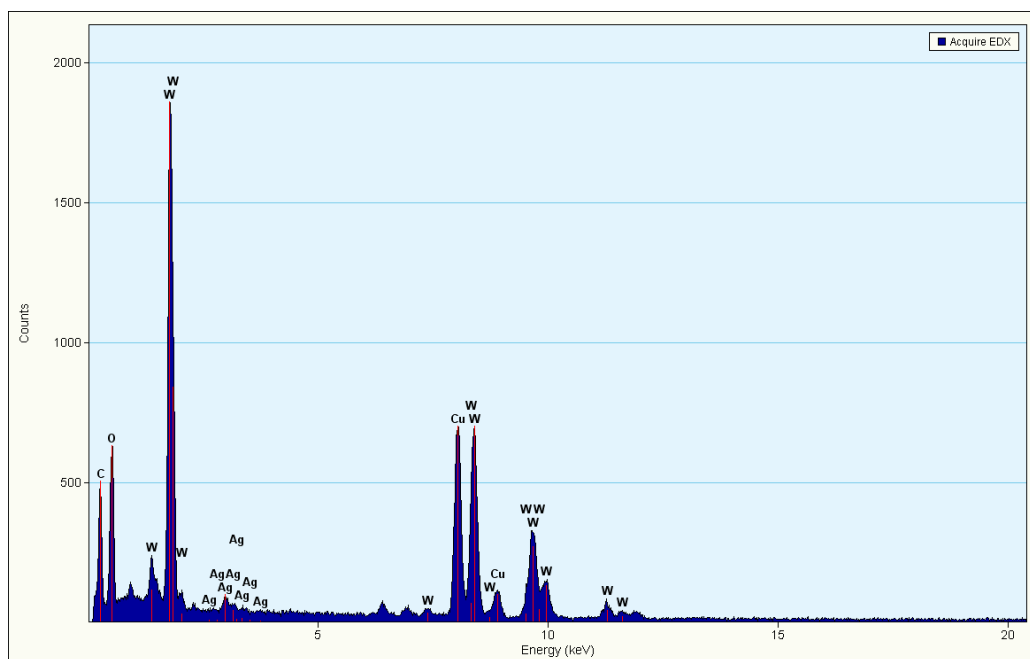

**Figure S2.** TEM-EDX of Ag/WO<sub>3</sub> catalyst.

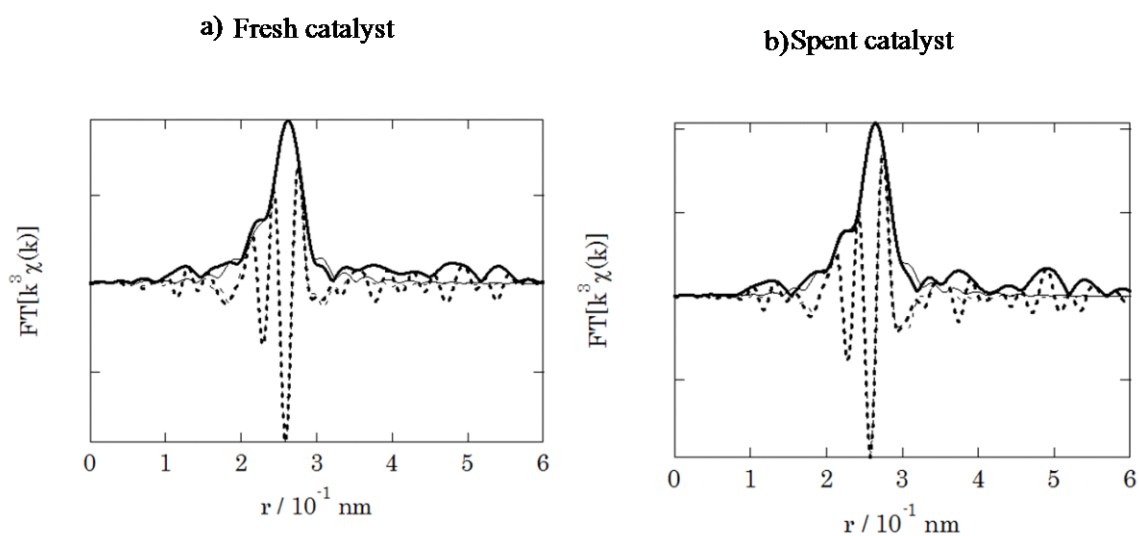

**Fig. S3** EXAFS spectra of Ag/ WO<sub>3</sub> catalyst a) fresh catalyst and b) spent catalyst.

#### Dissociation of H<sub>2</sub>O<sub>2</sub>

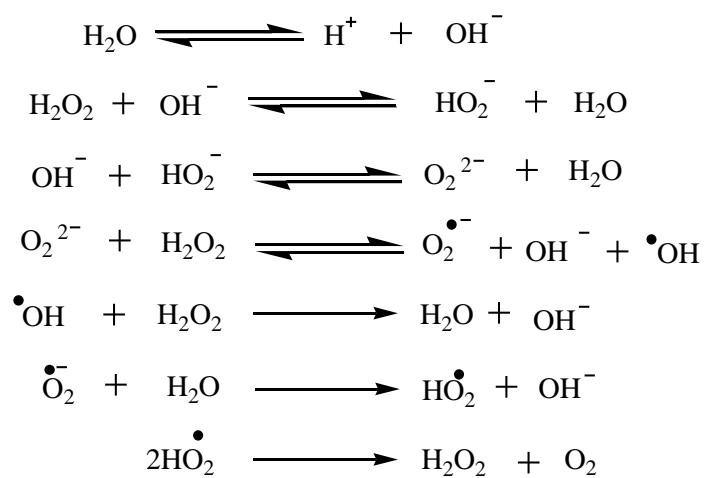

Scheme S1. Mechanism of oxidative coupling of aniline to azoxybenzene

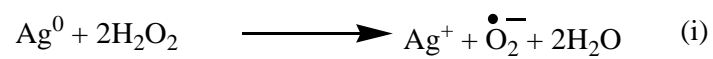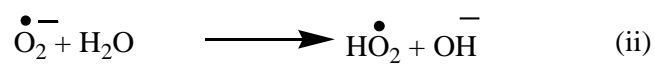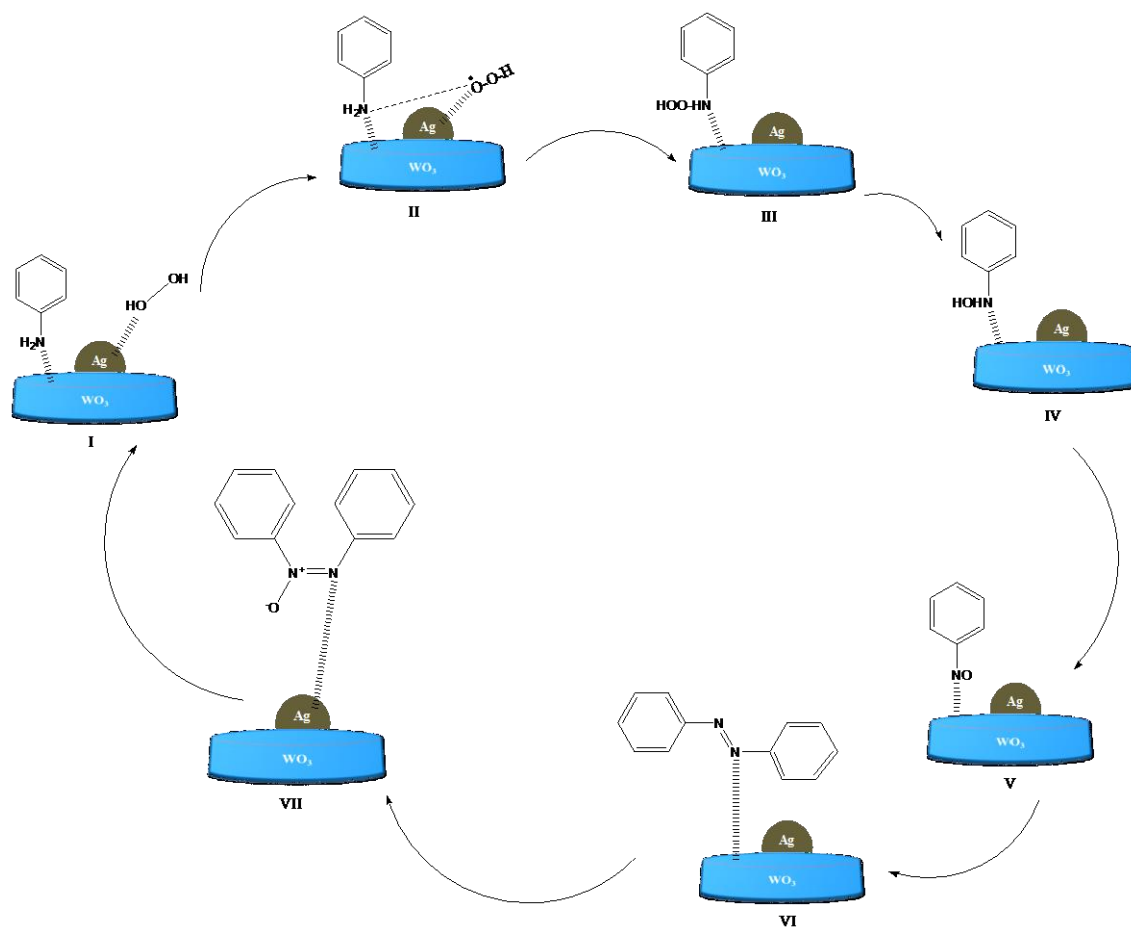

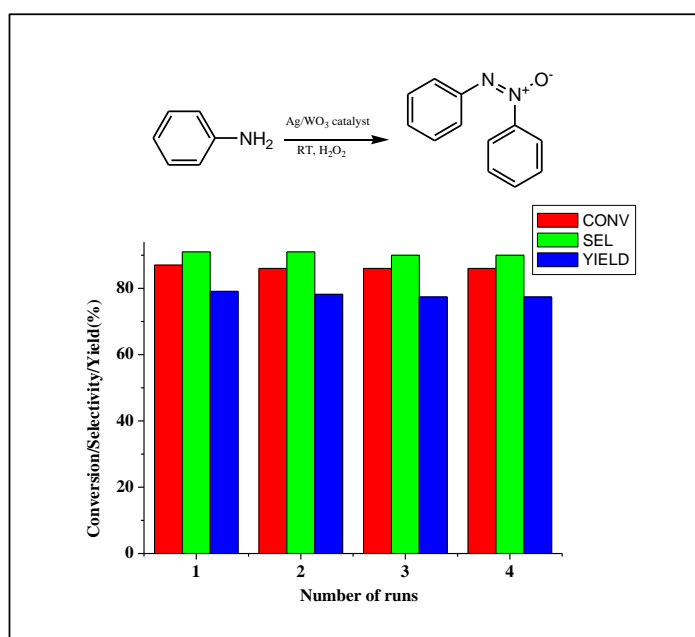

**Fig. S4** Recyclability test of Ag/WO<sub>3</sub> nanostructure catalyst for the oxidation of aniline to azoxybenzene.

Reaction Condition: solvent= acetonitrile; aniline =1g; weight of catalyst = 0.10 g; aniline:  
H<sub>2</sub>O<sub>2</sub> mole ratio =1:3; temperature = Room Temperature, time= 24 h.
